## **Multivariate analysis reveals environmental and genetic determinants of element covariation in the maize grain ionome**

Alexandra Asaro<sup>1</sup>, Brian P. Dilkes<sup>2</sup>, Ivan Baxter<sup>3\*</sup>

<sup>1</sup>Donald Danforth Plant Science Center, St. Louis, Missouri, United States of America

<sup>2</sup>Department of Biochemistry, Purdue University, West Lafayette, Indiana, United States of  
America

<sup>3</sup>USDA-ARS, Donald Danforth Plant Science Center, St. Louis, Missouri, United States of  
America

\*Corresponding author

E-mail: [ivan.baxter@ars.usda.gov](mailto:ivan.baxter@ars.usda.gov) (IB)

## 1 **Abstract**

2       Plants obtain elements from the soil through genetic and biochemical pathways responsive  
3 to physiological state and environment. Most perturbations affect multiple elements which leads  
4 the *ionome*, the full complement of mineral nutrients in an organism, to vary as an integrated  
5 network rather than a set of distinct single elements. To examine the genetic basis of covariation  
6 in the accumulation of multiple elements, we analyzed maize kernel ionomes from Intermated  
7 B73 x Mo17 (IBM) recombinant inbred populations grown in 10 environments. We compared  
8 quantitative trait loci (QTL) determining single-element variation to QTL that predict variation  
9 in principal components (PCs) of multiple-element covariance. Single-element and multivariate  
10 approaches detected partially overlapping sets of loci. In addition to loci co-localizing with  
11 single-element QTL, multivariate traits within environments were controlled by loci with  
12 significant multi-element effects not detectable using single-element traits. Gene-by-environment  
13 interactions underlying multiple-element covariance were identified through QTL analyses of  
14 principal component models of ionome variation. In addition to interactive effects, growth  
15 environment had a profound effect on the elemental profiles and multi-element phenotypes were  
16 significantly correlated with specific environmental variables.

## 17 **Author Summary**

18       A multivariate approach to the analysis of element accumulation in the maize kernel  
19 shows that elements are not regulated independently. By describing relationships between  
20 element accumulation we identified new genetic loci invisible to single-element approaches. The  
21 mathematical combinations of elements distinguish groups of plants based on environment,  
22 demonstrating that observed variation derives from interactions between genetically controlled  
23 factors and environmental variables. These results suggest that successful application of

24 ionomics to improve human nutrition and plant productivity requires simultaneous consideration  
25 of multiple-element effects and variation of such effects in response to environment.

## 26 **Introduction**

27 Elements are distinct chemical species, and studies of element accumulation frequently  
28 investigate each element separately. There is overwhelming evidence, however, that element  
29 accumulations covary due to physical, physiological, genetic, and environmental factors. In a  
30 dramatic example in *Arabidopsis thaliana*, a suite of elements responds to Fe deficiency in such  
31 a concerted manner that they can be used to predict the deficiency or sufficiency of Fe for the  
32 plant more accurately than the measured level of Fe in plant tissues [1]. The basis of this  
33 covariation can be as simple as co-transport of multiple elements. IRT1 is a metal transporter  
34 capable of transporting Fe, Zn, and Mn. IRT1 is upregulated in low Fe conditions resulting in an  
35 environmentally-dependent link between Fe and other ions [2]. Other pairs of co-regulated  
36 elements, such as Ca and Mg, which have been shown to exhibit shared genetic regulatory  
37 networks in *Brassica oleracea* [3], should be affected identically, or predictably, by genetic  
38 variation. When *A. thaliana* recombinant inbred line populations were grown in multiple  
39 environments, genetic correlations among Li-Na, Mg-Ca, and Cu-Zn were observed across all  
40 environments while Ca-Fe and Mg-Fe were only correlated in a subset of environments [4].  
41 Shared genetic control of ion transport without substantial environmental responsiveness should  
42 result in the former pattern, along with significantly less capacity for homeostasis across  
43 environmental concentrations and availabilities of elements. Environmentally-responsive  
44 molecular mechanisms, reminiscent of *IRT1* upregulation, could result in environmentally-  
45 variable patterns of correlations. Baxter et al. previously tested element seed concentrations for  
46 correlations in the maize Intermated B73 x Mo17 (IBM) recombinant inbred population, finding

47 several correlated element pairs, the strongest of which was between Fe and Zn [5]. Yet, few  
48 QTL impacting more than one element were found, likely due to effects on multiple elements  
49 being below the threshold of observation when mapping on single element traits with limited  
50 numbers of lines. These observations indicate that, while understanding the factors driving  
51 individual element accumulation is important, we must consider the ionome as a network of co-  
52 regulated and interacting traits [6]. We propose that formally considering this coordination  
53 between elements can provide deeper insight than focusing on each element in isolation.

54       Multivariate analysis techniques, such as principal components analysis (PCA), can reduce  
55 data dimension and summarize covariance of multiple traits as vectors of values by minimizing  
56 the variances of input factors to new components. When multiple phenotypes covary, as occurs  
57 for the elements in the ionome, this approach may complement single element approaches by  
58 describing trait relationships. In studies on crops such as maize, PCA has been used as a strategy  
59 to consolidate variables that may be redundant or reflective of a common state [7–9]. PCA has  
60 proved useful in previous QTL mapping efforts, facilitating detection of new PC QTL not found  
61 using univariate traits in analyses of root system architecture in rice [10] and kernel attributes,  
62 ear architecture, and enzyme activities in maize [11–13]. In the current study, we expect that  
63 elemental variables are functionally related and therefore need new traits to describe elemental  
64 covariation. Since we do not know the exact nature of these relationships, and the ionome varies  
65 depending on environment, PCA is useful in that it does not require *a priori* definition of  
66 relationships between variables. If the PCA approach leads to novel loci and insights into how  
67 the ionome is functioning, it will be a valuable addition to the study of mineral nutrient  
68 regulation.

69 Here we show that developing multivariate traits reveals environmental and genetic  
70 effects that are not detected using single elements as traits. We performed PCA on element  
71 profiles from the maize IBM population [14] grown in 10 different environments. Different  
72 relationships between elements were identified that depended on environment. QTL mapping  
73 using multi-element PCs as traits was carried out within each environment separately.  
74 Comparing these multivariate QTL mapping results to previous QTL analyses of the same data  
75 using each single element as traits for QTL analysis [15] demonstrates that a multivariate  
76 approach uncovers unique loci affecting multi-element covariance. Additionally, an experiment-  
77 wide PCA performed on combined data from all environments produced components capable of  
78 separating lines by environment based on their whole-ionome profile. These experiment-wide  
79 factors, while representative of environmental variation, also exhibited a genetic component, as  
80 loci affecting these traits were detected through QTL mapping.

## 81 **Results**

### 82 **Summary of Data Collection and Previous Analysis of Single Element Traits**

83 We previously acquired data on 20 elements measured in the seeds from *Zea mays* L.  
84 Intermated B73 x Mo17 recombinant inbred line (IBM) populations [14] grown in 10 different  
85 location/year settings [15]. This work is briefly summarized here as it serves as the basis of our  
86 comparison. The kernels came from RILs of the IBM population cultivated across six locations  
87 and five years. Quantification of the accumulation of 20 elements in kernels was done using  
88 inductively coupled plasma mass spectrometry (ICP-MS). Weight-adjusted element  
89 measurements were used for a QTL analysis to detect loci contributing to variation in seed  
90 element contents [15]. The current study is motivated by previous demonstrations of elemental  
91 correlations and mutant phenotype analyses which indicate extensive relationships between

92 elements [1, 4]. To explore this formally, we further analyzed these data from a multiple-element  
93 perspective.

#### 94 **Element to Element Correlations**

95         Several elements were highly correlated across the dataset, exhibiting pairwise  
96 relationships among lines in a given environment that passed a conservative Bonferroni  
97 correction for multiple tests. We detected 209 pairs of elements that were genetically correlated  
98 out of 1,900 possible correlations across environments (190 pairs per environment). We expect  
99 that evidence of robust genetic control would be provided by repeated observation of trait  
100 correlations in multiple environments. Of the six locations included in this experiment, we  
101 obtained data from three locations (FL, IN, and NY) from plant material grown in two different  
102 years. Seven element-pairs were correlated in five or more of these six environments: Mn and  
103 Mg, Ca and Sr, S and P, K and P, P and Mg, S and Mg, and Fe and Zn (Fig 1). Other element-  
104 pair correlations were driven by the genetic variation of the IBM in fewer environments. For  
105 example, Mn and P were correlated in FL05, NY05, and NY12 ( $r_p = 0.50, 0.48, 0.51$ ) but were  
106 not significantly correlated in FL06, IN09, or IN10 ( $r_p = 0.31, 0.20, 0.18$ ). Thus, while some  
107 correlations exist in multiple years and multiple locations, element correlations were affected by  
108 both location and year.

109         In our previous single-element QTL analysis of these data, loci comprising QTL for two  
110 or more different elements were detected (Table 1). This shared genetic control of multiple  
111 elements was readily apparent in the trait correlations calculated within environments, as five of  
112 the nine shared-element QTL exhibited corresponding element pair correlations within the given  
113 environment. For example, phosphorous, which was in three of the seven most reproducible  
114 element-pair correlations, exhibited the highest incidence of shared QTL with other elements.

115 These included shared QTL between P accumulation and all three of the reproducibly P-  
 116 correlated elements: S and the cations K and Mg. In addition, P was affected by the only QTL  
 117 shared between more than two elements, which affected P, S, Fe, Mn, and Zn accumulation in  
 118 NY05 (Fig 2). Consistent with the possibility of variation in transport processes affecting  
 119 element accumulation correlations, shared QTL were frequently found between elements with  
 120 similar structure, charge, and/or type, such as Ca and Sr or Fe and Zn. These element correlations  
 121 and post-hoc comparisons of shared QTL localizations suggest a genetic basis for covariance of  
 122 the ionome in the RIL population.

123 **Table 1. QTL Affecting Variation for Multiple Elements in the Same Environment.**

| Environment | Chr | Pos (cM)<br>† | E1 1 | E1 2 | E1 3 | E1 4 | <del>124</del> |
|-------------|-----|---------------|------|------|------|------|----------------|
| NY05        | 1   | 400           | Mn   | Ni   | ---  | ---  | ---            |
| NY05        | 3   | 323           | Sr   | Ca   | ---  | ---  | ---            |
| NY05        | 5   | 201           | Mn   | Zn   | P    | S    | Fe             |
| NY06        | 1   | 532           | Mn   | Mg   | ---  | ---  | ---            |
| IN09        | 4   | 306           | Fe   | K    | ---  | ---  | ---            |
| IN10        | 2   | 213           | Mo   | Cd   | ---  | ---  | ---            |
| NY12        | 5   | 203           | Zn   | Fe   | ---  | ---  | ---            |
| FL05        | 1   | 230           | B    | Mn   | ---  | ---  | ---            |
| FL05        | 4   | 159           | Fe   | Zn   | ---  | ---  | ---            |

125 †Average position

126 **Principle Components Analysis of Covariance for Elements in the Ionome**

127 To better describe multi-element correlations and thereby detect loci controlling  
 128 accumulation of two or more elements, we derived summary values representing the covariation  
 129 of several elements. We implemented an undirected multivariate technique, principal  
 130 components analysis (PCA), for this purpose. PCA reduced correlated elements into principal  
 131 components (PCs), orthogonal variables that account for variation in the original dataset, each  
 132 having an associated set of rotations (also known as loadings) from the input variables. After  
 133 removing elements prone to analytical artifacts, PCA was conducted using the remaining 16  
 134 elements from each of the 10 environments separately. This produced 16 principal components

135 in each environment (S1 Fig) of which we retained for further analysis only PCs representing  
136 more than 2% of the total variation. This resulted in as few as 11 and as many as 15 PCs  
137 depending on environment.

138 Remarkably, there is substantial overlap in the loadings of many elements in the first and  
139 second PCs across some environments, suggesting a reproducible effect of genetic variation on  
140 the ionome in these environments (Fig 3). Additionally, the loadings of elements are consistent  
141 with the pair-wise relationships observed in the element-by-element correlations. For example,  
142 Ca and Sr frequently load PCs in a similar direction. The PC loadings derive from inputs of  
143 several elements to a single PC variable. All retained PCs in all 10 environments have a loading  
144 contribution of at least .25 in magnitude from two or more elements. While some patterns existed  
145 across environments, many PC loadings differed in both magnitude and direction according to  
146 environment, suggesting instability of element-pair correlations across the environments. As  
147 these PCs were separately calculated in each environment, we compared PC traits from different  
148 environments. We used correlation tests of element loadings in PCs to identify PCs from  
149 different environments that were constructed from similar relationships. Because loading  
150 direction is arbitrary, both strong positive and strong negative correlations were examined. 52  
151 pairs of PCs exhibited loadings correlations with a Pearson correlation coefficient greater than  
152 0.75 or less than -0.75 (S2 Fig). Thus, the PC analyses produced pairs of correlated PCs in  
153 different locations that, while not necessarily recovered in the same order, derived from similar  
154 patterns of elemental variation.

### 155 **QTL Mapping of Ionomic Covariance Components**

156 The PCs from each environment were used as traits for QTL detection. Stepwise QTL  
157 mapping using these derived traits yielded 93 QTL that exceeded an estimated statistical



158 threshold of  $\alpha=0.05$  from within-environment permutations (Fig 4C). 56 of these QTL affecting  
159 multiple-element covariance components overlapped with previously detected single-element  
160 QTL in the same environment [15] (Fig 4A). In some cases, two or more PC traits within an  
161 environment resolved to one single-element QTL. This was observed particularly for elements  
162 with strong effect QTL, such as Mo, Cd, and Ni. For example, in IN10, PC2 and PC10 both have  
163 QTL that co-localize with the Cd QTL on chromosome 2. Likewise, in NY05, PC3, PC5, PC6,  
164 and PC9 all detect a QTL coinciding with the large-effect Ni QTL on chromosome 9. These PCs  
165 within a single environment all have varying levels of Ni contribution, as well as varying levels  
166 of contribution from other elements. Although the relationship among elements described by  
167 each PC is distinct, the same single-element locus can be detected due to that locus affecting an  
168 element that is present within each set of relationships. This repeated detection of the same  
169 locations contributes to the higher number and proportion of detected PC QTL that were shared  
170 with element QTL (56/93) than element QTL that were shared with PC QTL (18/79), although  
171 the same genomic locations underlie this overlap. 37 PC QTL were detected at loci not seen  
172 using single element traits, demonstrating that PC traits can outperform single element data for  
173 the detection of shared genetic control of correlated characters. For instance, two PC5 QTL from  
174 the NY06 growout were located on chromosome 1 at positions distinct from any elemental QTL  
175 (Fig 4B). QTL mapping on single elements may not have the power to detect loci with small  
176 coordinate effects on several elements. So as to not inflate PC-specific QTL, they are defined  
177 here as QTL greater than 25 cM away from any elemental QTL in the same environment.

178 PC QTL analysis captured previously observed single-element QTL shared between  
179 elements within a particular environment. Of the nine loci affecting variation for multiple  
180 elements in the same environment (Table 1), four loci also impact variation for a PC trait in that

181 environment (Table 2). For example, in NY05, a QTL for PC1 overlaps the QTL that was  
 182 detected in the single element analyses of P, S, Fe, Mn, and Zn on chromosome 5 (Fig 2). The  
 183 PC QTL in this case was as strong as the association between the locus and Fe accumulation and  
 184 more significant than the P, S, Mn, and Zn elemental QTL. Thus, QTL mapping a multi-element  
 185 PC was as strong as the best single-element approach for previously detected QTL. For traits that  
 186 cause variation in multiple elements, such as root structure, the PC approach may be preferable  
 187 to single elements, particularly in cases where single element changes are of small effect or  
 188 below detection limits while concerted changes to multiple elements display a larger effect.

189 **Table 2. QTL for Multiple Elements and PC(s) in the Same Environment.**

| Environment | Chr | Pos (cM)<br>† | Elements         | PC(s)    |
|-------------|-----|---------------|------------------|----------|
| NY05        | 1   | 400           | Mn, Ni           | PC11     |
| NY05        | 3   | 323           | Sr, Ca           | --       |
| NY05        | 5   | 201           | Mn, Zn, P, S, Fe | PC1      |
| NY06        | 1   | 532           | Mn, Mg           | --       |
| IN09        | 4   | 306           | Fe, K            | --       |
| IN10        | 2   | 213           | Mo, Cd           | PC2, PC4 |
| NY12        | 5   | 203           | Zn, Fe           | PC7      |
| FL05        | 1   | 230           | B, Mn            | --       |
| FL05        | 4   | 159           | Fe, Zn           | --       |

191 †Average position of element QTL, PC QTL are within 5 cM

192 We compared PCs from different environments and looked for overlapping QTL among  
 193 PCs in different environments with correlated loadings. Of the 52 PC pairs with correlated  
 194 loadings, 37 had no QTL for one or both of the PCs, consistent with a shared environmental  
 195 factor variable in those fields as the basis of that variation. Of the remaining 15 pairs with at least  
 196 one QTL detected for each member of the pair, PCs in five pairs had shared QTL. In all five  
 197 cases, the QTL shared between these pairs of PCs correspond to a large-effect single-element  
 198 QTL. Six PC traits belonging to three correlated pairs, PC4 in NY05 and PC6 in IN09 ( $r_p =$   
 199 0.81), PC4 in FL05 and PC3 in NY05 ( $r_p = -0.84$ ), and PC3 in IN10 and PC2 in NC06 ( $r_p =$   
 200 0.89), detected a QTL coinciding with a Mo QTL, a locus on chromosome 1 encoding the

201 ortholog of the *A. thaliana* MOT1 molybdenum transporter. The same scenario exists for PC2 in  
202 IN09 and PC2 in NY05 ( $r_p = -0.78$ ), both affected by the QTL on chromosome 2 that had a  
203 strong effect on Cd in our single-element QTL mapping experiments. Finally, PC8 in NC06 and  
204 PC5 in NY05 ( $r_p = 0.76$ ) both map to a large-effect Ni QTL. Despite the resolution to QTL  
205 detected in a single-element analysis, in all of these cases correlations between loadings were not  
206 driven by a single element, but rather by similar loadings for most elements (S2 Fig). In addition  
207 to overlaps at these strong-effect single element QTL, 6 other pairs of correlated PCs have QTL  
208 that do not overlap. Correlated PCs with QTL at different chromosomal positions in different  
209 environments could be due to states, such as increased root system volume or iron deficiency,  
210 that may arise from distinct processes in each environment yet can generate a consistent  
211 physiological response. In these cases, the ionome displays similar trait covariance but different  
212 genetic architecture consistent with genotype by environment interactions.

213         The PC approach also detected a QTL that was found for different single elements  
214 depending on environment. The same locus on chromosome 7 encoded QTL for three different  
215 elements, Cu, K, and Rb, each in a different environment. K and Rb are chemical analogs.  
216 Failure to detect this QTL as affecting both elements in the same environment may simply  
217 indicate the poor power to detect all QTL, resulting in false negative results. It is less likely, but  
218 possible, to result from incorrect assessment of a shared genetic basis due to fortuitous linkage of  
219 multiple loci. Using the PC traits, we detected QTL at this position in these same three  
220 environments and a fourth environment. Thus, PCs can provide an improved estimate for the  
221 genetic effect on phenotypic variance for multi-element traits. In SA10, no QTL were mapped  
222 for Cu, Rb, or K alone. Yet, this locus was detected as significantly affecting variation in PC9  
223 calculated from SA10, the loadings of which show a strong contribution from Cu and Rb.

224           The identification of both unique and previously observed QTL through this multivariate  
225 approach demonstrates the complementary nature of working with trait covariance as well as the  
226 component traits and supports previous work showing that elemental traits are mechanistically  
227 interrelated. The repeated finding of results consistent with GxE led us to investigate this  
228 formally.

### 229 **QTL by Environment Interactions**

230           Our prior analyses found QTL by environment interactions contributing to accumulation of  
231 single elements [15]. Given element correlations and partially overlapping sets of element and  
232 PC QTL, we expect to detect QTL by environment interactions that impact multi-element traits.  
233 To look at the effects of environment on genetic regulation of multi-element phenotypes, we  
234 conducted another PCA, this time on element concentrations of lines from all environments  
235 combined. If the genetic and environmental variances do not interact, we expect some PCs will  
236 reflect environmental variance and others will reflect genetic variance. However, if the ionome is  
237 reporting on a summation of physiological status that results from genetic and environmental  
238 influences, some PCs calculated from ionomic traits should be both correlated with  
239 environmental factors and result in detectable QTL.

240 **PCA across environments.** The covariance between element accumulation data across all  
241 environments was summarized using principal components analysis. Elements prone to  
242 analytical artifacts (B, Na, Al, As) were removed prior to analysis. 16 across-environment PCs  
243 (aPCs) describing the covariation of the ionome were calculated for every RIL in every  
244 environment.

245           Out of a concern that the different lines present in each growout unduly influenced the  
246 construction of PCs specific to each environment, we performed the following tests. First, we

247 looked at only those locations where two or more growouts were performed, so that location  
248 replication might be considered. Second, to identify a balanced sample set present in all  
249 environments, we identified the lines that were grown in all of these six growouts. PCA of the 16  
250 element measurements was conducted across environments (S3 Fig) and the loadings of each  
251 element into each PC were recorded. Thus, the loadings of the 16 elements in the PCA were  
252 calculated from a set of common genotypic checks distributed within each environment. We used  
253 these loadings to calculate PCA projections (PJs) from all lines in all environments. In this way  
254 we made comparisons of the same calculated values in each environment. We found that the PJs  
255 and aPCs were strongly correlated; PJ1 and aPC1 were nearly identical ( $r_p = .998$ ) and PJs 2–5  
256 correlated with at least one of aPCs 2–5 at  $r_p > .66$ . The correlations between the loadings from  
257 PJs and aPCs reflected these same patterns. To reduce the incidence of artifacts or overfitting,  
258 aPCs accounting for less than 2% of the total variation were eliminated for further analyses,  
259 leaving seven aPCs.

260 Growth environment had a significant effect on all aPCs ( $p < 0.001$ ). The first two aPCs  
261 were highly responsive to the environment (Fig 5). The lines from each environment cluster  
262 together when plotting aPC1 vs aPC2 values, with distinct separation between environments and  
263 years. In order to identify environmental factors responsible for ionome covariance, weather  
264 station and soil data from all environments except SA06 were recovered from databases (see  
265 methods). Correlations were calculated between season-long or quarter-length summaries of  
266 temperature and the aPC values for the nine environments. The weather variables, all  
267 temperature-based, were not correlated with aPCs in many cases, although correlations  
268 exceeding  $r_p = 0.50$  were observed for aPCs 2,4, and 5 (Fig 6A). The strongest correlation  
269 observed for aPC1 was with average maximum temperature in the fourth quarter of the growing

270 season ( $r_p = 0.35$ ) (Fig 6B) while the highest observed for aPC2 was for average maximum  
271 temperature during the third quarter ( $r_p = 0.58$ ) (Fig 6C). The relatively small number of  
272 environments, substantial non-independence of the weather variables, and likely contribution of  
273 factors other than temperature limit the descriptive power of these correlations.

274 The lack of particularly strong correlations between the first two aPCs and temperature  
275 variables suggests that other variables, possibly field to field variation in soil composition,  
276 fertilizer application, humidity, or abiotic factors, are likely to have an influence. Correlations  
277 were also calculated between environment averages of the PCs and soil variables (Fig 6D).  
278 While the majority of these features were not found to be highly correlated with aPCs, we did  
279 observe a strong negative correlation between aPC2 and soil pH ( $r_p = -.78$ ) (Fig 6E).

280 In order to determine genetic effects on these components, the calculated values for aPC1  
281 through aPC7 were used as traits for QTL analysis in each of the 10 environments. Unlike the  
282 earlier described PCAs done in environments separately, these aPCs are calculated across all  
283 environments and are therefore comparable between environments. QTL mapping detected at  
284 least four loci controlling each aPC and a total of 38 QTL. Nine of these QTL were found in  
285 common across multiple environments and 29 were only detected in a single environment (Fig  
286 7). Of the aPC QTL, the highest LOD score QTL were present in multiple environments and  
287 corresponded to the locations of the two strongest single element QTL previously detected from  
288 the same data (Mo on chromosome 1 and Cd on chromosome 2). The detection of QTL, together  
289 with the strong environmental determination of aPCs 1–7, demonstrates that ionomic covariation  
290 results from coordinate environmental and genetic variation.

291 Based on the stochastic detection of QTL in only a subset of growth environments,  
292 substantial interaction between the environment aPC QTL is expected. A QTL of particular

293 interest is the aPC2 QTL detected for Mo at the ortholog of the *MOT1* locus. Previous studies  
294 have demonstrated a connection between pH and molybdenum, with Mo availability in soil being  
295 increased by high pH. It was found that the *MOT1* locus in *A. thaliana* determines response to  
296 pH changes and resultant changes in Mo availability in an allele-specific manner, suggesting an  
297 adaptive role for variation in *MOT1* with respect to soil pH [16]. The correlation between aPC2  
298 and pH was significant and aPC2 identified a QTL coinciding with a Mo QTL suggesting genetic  
299 variation in pH-dependent changes to Mo availability across environments. The loading  
300 magnitude for Mo into aPC2 is 0.21 but Co, Ni, Rb, and Cd contribute even more, with loading  
301 magnitudes of 0.24, 0.46, 0.55, and 0.41, respectively. QTL for aPC2 also overlap with QTL for  
302 Cd and Ni. With aPC2 representing several elements, the correlation with soil pH and overlap  
303 with single element QTL may reflect a multi-element phenotype responding to changes in pH.  
304 Further investigation is needed to molecularly identify the genes underlying aPC QTL, their  
305 biological roles, and their interaction with specific environmental variables.

## 306 **Discussion**

307 In this study, we demonstrate that multi-trait analysis is a valuable approach for  
308 understanding the ionome. The ionome is a homeostatic system, and effects on one element can  
309 affect other elements [1]. Many biological processes in maize have the potential to impact  
310 several elements. Indirect effects on a suite of elements have been demonstrated for numerous  
311 physiological states. Radial transport of nutrients is controlled in part by endodermal suberin, the  
312 structure and deposition of which can adapt in a highly plastic manner in response to deficiencies  
313 in K, S, Na, Fe, Zn, and Mn, potentially modifying transport of additional elements [17]. Other  
314 examples of indirect effects can be found in Arabidopsis *TSC10A* mutants with reduced 3-  
315 ketodihydrosphinganine (3-KDS) reductase activity. Because 3-KDS reductase is needed for

316 synthesis of the sphingolipids that regulate ion transport through root membranes, these mutants  
317 exhibit a completely root-dependent leaf ionome phenotype of increased Na, K, and Rb, and  
318 decreased Mg, Ca, Fe, and Mo [18].

319 In line with the abundance of concerted element changes seen in ionome mutants, we  
320 detected elemental correlations and QTL that were present for more than one element.  
321 Phosphorous exhibited the greatest number of QTL overlap with other elements, including the  
322 cations K and Mg. Phosphorous is a central nutrient in plant development and regulates other  
323 elements, complexing with cations in the form of phytic acid in maize seeds [19]. Additional  
324 shared QTL included those between Ca and Sr, Mo and Mn, and Zn and Fe. Ca and Sr are  
325 chemical analogs while Zn and Fe regulation have been linked at the physiological and  
326 molecular level [6, 20]. Mo and Mn have roles in protein assimilation and nitrate regulation [21,  
327 22] and exhibit a regulatory relationship [23]. Thus, these shared QTL likely reflect genetic  
328 polymorphisms affecting the activity of multi-element regulatory genes or genetic changes  
329 targeted to a single element with pleiotropic effects on other elements via homeostatic  
330 mechanisms.

331 The 37 PC-specific loci identify novel loci in maize with the potential to expand our  
332 understanding of the genetic basis of ionome variation. Various biological mechanisms may  
333 drive the detection of these unique PC QTL. For example, the ionome has been shown to exhibit  
334 tissue-dependent, multi-element changes in response to nitrogen availability [24]. A unique PC  
335 QTL could be detected at a nitrogen metabolism gene if variation at that gene confers additive  
336 effects on multiple elements. Variation in genes involved in adaptive responses to drought stress,  
337 soil nutrient deficiencies, or toxic micronutrient levels, can result in covariation among several



338 elements without particularly strong effects on a single element [1, 6, 25], making such genes  
339 only identifiable as QTL when working with multivariate traits.

340         The majority of molecularly identified ionomic mutants have multi-element effects. In  
341 particular, mutants in genes involved in Casparian strip function and associated root-based  
342 element flow, including *MYB36* [26], *ESBI* [27], and *LOTRI* [28], all display pleiotropic effects  
343 on multiple element accumulation in the leaves. In some cases, QTL affecting these traits might  
344 be detected using both single and multi-element approaches, as was the case with the  
345 chromosome 5 QTL we mapped for P, S, Fe, Mn, and Zn, as well as for PC1. However, if the  
346 changes to a suite of elements are small for individual elements or uncontrolled environmental  
347 conditions inflate the magnitude of error in measuring the genetic effects, a multi-ionomic trait  
348 may be a better fit for QTL detection. The fact that we detect both overlapping and unique sets of  
349 element and PC QTL suggests that single and multivariate approaches should be used in concert  
350 to avoid gaps in our understanding of element regulatory networks. The evidence suggests that  
351 some of the most interesting ionome homeostasis genes, including genes that are involved in  
352 environmental adaptation extending beyond the ionome, will be those best detected through  
353 multivariate methods.

354         In addition to being a tool for understanding the genetics of multi-element regulation,  
355 principal components also reflected environmental variation. An across-environment PCA of all  
356 lines was used to find variables that describe variation between lines among all 10 environments.  
357 The first two across-environment PCs capture most of the variation in the ionome across 10  
358 different growouts, much of which is environmental. This can be seen in the ability of aPC1 and  
359 aPC2 to separate growouts by location and, in some cases, different years within a location.

360 Thus, components from a PCA done across environments can capture the impact of environment  
361 on the ionome as a whole.

362 In our across-environment analysis, to account for different sets of IBM lines within  
363 environments, we tested an approach of projecting loadings from a PCA on a smaller set of lines  
364 onto the full data set. The similarity of the PJs and aPCs led us to conclude that the sampling  
365 effects of having different subsets of lines in each environment had little effect on the trait  
366 covariance estimation. This approach to validate aPCs may be useful in other studies that seek to  
367 connect data from disparate experiments and federate data collected by multiple laboratories.  
368 The method of deriving traits across environments using a small set of genotypic checks opens  
369 up the possibility of using multi-trait correlations across environments to permit very large scale  
370 GxE mapping experiments on data sets not initially intended for this purpose. Retrospective  
371 analysis of data, or further data generation from preexisting biological material present in both  
372 public and private spheres, is enabled by this approach. For example, multiple association panels  
373 have been constructed for trait mapping in maize. Typically, comparison of multi-trait  
374 correlations across different populations is inhibited by our inability to ensure the 1:1  
375 correspondence of traits. By using the subset of lines common to all mapping populations to  
376 create a projection, comparable traits could be reflected onto to full datasets for comprehensive  
377 genetic evaluation and the loci detected in each panel could then be compared, as we have done  
378 here.

379 PCA on all environments is a way to find variation resulting from environmental factors  
380 that impact multiple elements, for example weather or soil variables. The weather data available  
381 to us for this study was limited to maximum and minimum temperature. We observed the  
382 strongest correlations for aPC1 and aPC2 during the third and fourth quarters of the growing

383 season. Because seed filling occurs in the latter part of the season, temperature during this time  
384 could have a pronounced effect on seed elemental composition. However, the lack of striking  
385 correlations between environmental components and the projections and aPCs, environmental  
386 factors other than temperature must be the strongest factors. Information on soil properties  
387 provided insight into a potential driver of the environmental variability captured by aPC2, with a  
388 strong negative correlation between aPC2 and soil pH. Soil pH alters element availability in soil,  
389 and pH differences between locations should result in different kernel ionomes.

390 QTL were mapped to the aPCs that describe whole ionome variation across  
391 environments. These loci may encompass genes that pleiotropically affect the ionome in an  
392 environmentally-responsive manner. The correlation between aPC2 with pH as well as the  
393 finding of an aPC2 QTL for Mo exemplifies the possibility of using across-environment PCA to  
394 detect element homeostasis loci that respond to a particular environmental or soil variable and  
395 produce a multi-element phenotype. To the extent that these differences are adaptive, these  
396 alleles can contribute to local adaptation to soil environment and nutrient availability. The  
397 identification of aPC QTL indicates that the variation captured by aPCs has both environmental  
398 and genetic components. Our previous study using single element traits found extensive GxE in  
399 this dataset through formal tests, so it is not surprising that we see a large environmental  
400 component as well as genetic factors contributing to variation in the across-environment PCs.  
401 Experiments with more extensive weather and soil data, or carefully manipulated environmental  
402 contrasts, are needed to create models with additional covariates and precisely represent  
403 environmental impacts. This multivariate approach could be especially powerful in studies with  
404 extensive and consistent environmental variable recording, such as the “Genomes to Fields”

405 Initiative, where specific environmental variables could be included in QTL models of multi-  
406 element GxE.

## 407 **Conclusions**

408 Here we have shown that treating the ionome as an interrelated set of traits using PCA  
409 within environments can identify novel loci. PCA across environments allowed us to derive traits  
410 that described both environmental and genetic variation in the ionome.

## 411 **Methods**

### 412 **Field Growth and Data Collection**

413 **Field growth and elemental profile analysis.** Lines belonging to the Intermated B73 x Mo17  
414 recombinant inbred (IBM) population [14] were grown in 10 different environments: Homestead,  
415 Florida in 2005 (220 lines) and 2006 (118 lines), West Lafayette, Indiana in 2009 (193 lines) and  
416 2010 (168 lines), Clayton, North Carolina in 2006 (197 lines), Poplar Ridge, New York in 2005  
417 (256 lines), 2006 (82 lines), and 2012 (168 lines), Columbia, Missouri in 2006 (97 lines), and  
418 Ukilima, South Africa in 2010 (87 lines). Elemental analysis was carried out in a standardized  
419 inductively coupled plasma mass spectrometry (ICP-MS) pipeline previously described in detail  
420 [15]. Analytical outlier removal and weight normalization was performed following data  
421 collection as described in our previous analysis of these data.

### 422 **Computational Analysis**

423 **Element correlation analysis.** Within environments, 190 Pearson correlation coefficients were  
424 calculated, one for each pair of the 20 measured elements. To control for multiple tests, we  
425 applied a Bonferroni correction at an alpha level of 0.05. Given 190 possible combinations,  
426 correlations with a p-value below  $0.05/190 = 0.00026$  were regarded as significant.

427 **Principal components analysis of ionome variation within environments.** Elements prone to

428 analytical error (B, Na, Al, As) were removed before to PC analysis, leaving 16 elements: Mg, P,  
429 S, K, Ca, Mn, Fe, Co, Ni, Cu, Zn, Se, Rb, Sr, Mo, and Cd. In an attempt to summarize the effects  
430 of genotype on covariance of ionic components, a PCA was done using elemental data for  
431 each of the 10 environments separately. The *prcomp* function in R with `scale = TRUE` was used  
432 for PCA on elemental data to perform PCA on the line average element values in an  
433 environment. This function performs singular value decomposition on a scaled and centered  
434 version of the input data matrix, computing variances with the divisor  $N-1$ . 16 PCs were returned  
435 from each environment. After removal of PCs accounting for less than 2% of the variance, the 10  
436 sets of PCs were used as traits in QTL analysis. Variance proportions and trait loadings for all  
437 PCs calculated across 10 environments are provided in S1 Table.

438 **QTL Mapping: principal components.** QTL mapping was done using stepwise forward-  
439 backward regression in R/qtl [29] as described previously for element phenotypes [15]. The  
440 mapping procedure was done for each environment separately, with PC line means for RILs in  
441 the given environment as phenotypes and RIL genotypes as input. The *stepwiseqtl* function was  
442 used to produce an additive QTL model for each PC, with the max number of QTL allowed for  
443 each trait set at 10. The 95<sup>th</sup> percentile LOD score from 1000 *scanone* permutations was used as  
444 the penalty for addition of QTL. The QTL model was optimized using *refineqtl* for maximum  
445 likelihood estimation of QTL positions. The locations of the PC QTL detected in this study were  
446 compared to the single element QTL from our previous study. Loci were considered distinct if  
447 they were at least 25 cM away from any single element QTL detected in the environment in  
448 which the PC QTL was detected. This serves as a conservative control in order to minimize the  
449 mistaken assessment of novelty for QTL with small changes in peak position.

450 **QTL by environment analysis: PCA across environments.** The 16 most precisely measured

451 elements were used for an additional principal components analysis. Again, the *prcomp* function  
452 in R with `scale = TRUE` was used for PCA on elemental data, however, all 16 element  
453 measurement values in all lines in all of the 10 environments were combined into one PCA.  
454 These PCs are referred to as across-environment PCs (aPCs). The first 7 aPCs explained 93% of  
455 the total covariation of these traits. A linear model was used to test the relationship of  
456 environmental parameters on these aPCs. All seven aPCs were also used for stepwise QTL  
457 mapping by the same method described above.

458 **QTL by environment analysis: Projection-PCA across environments.** The sets of lines grown  
459 in each our ten environments were drawn from the same population [14] but different subsets  
460 were grown and harvested in different environments. To achieve common multivariate  
461 summaries for all lines and growouts, we performed an alternative PCA using a smaller set of  
462 common lines. We then projected the loadings from this PCA onto the full dataset, as follows.  
463 First, a PCA was conducted on 16 lines common to six of the 10 environments (FL05, FL06,  
464 IN09, IN10, NY05, NY12). The loadings for each PC from this PCA were then used to calculate  
465 values from full set of lines across 10 environments to generate PCA projections (PJs). These  
466 derived values based on a common-line PCA were compared to previously described aPC values  
467 from the PCA done on all lines at once. Correlations between PJs and aPCs were computed to  
468 compare the outcomes of the two methods.

469 **Weather and soil data collection and analysis.** Weather data for FL05, FL06, IN09, IN10,  
470 NC06, NY05, NY06, and NY12 was downloaded from Climate Data Online (CDO), an archive  
471 provided by the National Climatic Data Center (NCDC) through the National Oceanic and  
472 Atmospheric Administration (<http://www.ncdc.noaa.gov/cdo-web/>). Data were not available for  
473 the South Africa growout. Daily summary data for each day of the growing season were

474 tabulated from the weather station nearest to the field location. Weather stations used to obtain  
475 data for each location are indicated in S2 Table. Minimum temperature (in degrees Celsius) and  
476 maximum temperature (in degrees Celsius) were available in each location. With these variables,  
477 average minimum temperature, and maximum temperature were calculated across the 120-day  
478 growing season as well as for 30 day quarters. Growing degree days (GDD) were calculated for  
479 the entire season and quarterly using the formula  $GDD = ((T_{max} + T_{min})/2) - 10$ .

480 Data describing soils from each location were obtained from the Web Soil Survey provided  
481 by the USDA Natural Resources Conservation Service  
482 (<http://websoilsurvey.sc.egov.usda.gov/App/HomePage.htm>). A representative area of interest  
483 was selected at the site of plant growth using longitude and latitude coordinates. When an area  
484 contained more than one soil type, a weighted average of measurements from all soil types was  
485 used. The data we downloaded from the Web Soil Survey were: pH, electrical conductivity (EC)  
486 (decisiemens per meter at 25 degrees C), available water capacity (AWC) (centimeters of water  
487 per centimeter of soil), available water supply (AWS) (centimeters), and calcium carbonate  
488 ( $CaCO_3$ ) content (percent of carbonates, by weight). Layer options were set to compute a  
489 weighted average of all soil layers.

490 The relationships between the seven experiment wide aPCs and the weather and soil  
491 variables were estimated by calculating Pearson correlation coefficients for the pairwise  
492 relationships. Correlations were also calculated between average element values and soil and  
493 weather variables in each environment.

## 494 **Acknowledgements**

495 The authors would especially like to thank our field collaborators Sherry Flint-Garcia, Peter  
496 Balint-Kurti, Torbert Rocheford, Jonathan Lynch, and Robert Snyder for their dedicated efforts  
497 to provide the seeds analyzed for this project. This work was supported by funding from the

498 National Science Foundation (IOS-1126950, IOS-1450341), the USDA Agricultural Research  
499 Service (5070-21000-039-00D). AA was a recipient of a Danforth Plant Science Fellowship  
500 from the Donald Danforth Plant Science Center.  
501

## 502 **References**

- 503 1. Baxter IR, Vitek O, Lahner B, Muthukumar B, Borghi M, Morrissey J, et al. The leaf  
504 ionome as a multivariable system to detect a plant's physiological status. *Proceedings of*  
505 *the National Academy of Sciences*. 2008;105: 12081-12086.
- 506 2. Korshunova YO, Eide D, Clark WG, Guerinot ML, Pakrasi HB. The IRT1 protein from  
507 *Arabidopsis thaliana* is a metal transporter with a broad substrate range. *Plant molecular*  
508 *biology*. 1999;40: 37-44.
- 509 3. Broadley MR, Hammond JP, King GJ, Astley D, Bowen HC, Meacham MC, et al. Shoot  
510 calcium and magnesium concentrations differ between subtaxa, are highly heritable, and  
511 associate with potentially pleiotropic loci in *Brassica oleracea*. *Plant Physiol*. 2008;146:  
512 1707-1720.
- 513 4. Buescher E, Achberger T, Amusan I, Giannini A, Ochsenfeld C, Rus A, et al. Natural  
514 genetic variation in selected populations of *Arabidopsis thaliana* is associated with ionic  
515 differences. *PLoS One*. 2010;5: e11081.
- 516 5. Baxter IR, Gustin JL, Settles AM, Hoekenga OA. Ionic characterization of maize  
517 kernels in the intermated B73 x Mo17 population. *Crop Science*. 2013;53: 208-220.
- 518 6. Baxter I. Ionomics: studying the social network of mineral nutrients. *Current Opinion in*  
519 *Plant Biology*. 2009;12: 381-386.
- 520 7. Burton AL, Johnson J, Foerster J, Hanlon MT, Kaeppler SM, Lynch JP, et al. QTL  
521 mapping and phenotypic variation of root anatomical traits in maize (*Zea mays* L.).  
522 *Theoretical and Applied Genetics*. 2015;128: 93-106.
- 523 8. Bouchet S, Bertin P, Presterl T, Jamin P, Coubriche D, Gouesnard B, et al. Association  
524 mapping for phenology and plant architecture in maize shows higher power for  
525 developmental traits compared with growth influenced traits. *Heredity*. 2017;118: 249-259.
- 526 9. Frey FP, Presterl T, Lecoq P, Orlik A, Stich B. First steps to understand heat tolerance of  
527 temperate maize at adult stage: identification of QTL across multiple environments with  
528 connected segregating populations. *Theoretical and Applied Genetics*. 2016;129: 945-961.
- 529 10. Topp CN, Iyer-Pascuzzi AS, Anderson JT, Lee C-R, Zurek PR, Symonova O, et al. 3D  
530 phenotyping and quantitative trait locus mapping identify core regions of the rice genome  
531 controlling root architecture. *Proceedings of the National Academy of Sciences*. 2013;110:  
532 E1695-E1704.
- 533 11. Liu Z, Garcia A, McMullen MD, Flint-Garcia SA. Genetic Analysis of Kernel Traits in  
534 Maize-Teosinte Introgression Populations. *G3: Genes Genomes Genetics*. 2016;6: 2523.
- 535 12. Choe E, Rocheford TR. Genetic and QTL analysis of pericarp thickness and ear  
536 architecture traits of Korean waxy corn germplasm. *Euphytica*. 2012;183: 243-260.
- 537 13. Zhang N, Gibon Y, Gur A, Chen C, Lepak N, Hohne M, et al. Fine Quantitative Trait Loci  
538 Mapping of Carbon and Nitrogen Metabolism Enzyme Activities and Seedling Biomass in  
539 the Intermated Maize IBM Mapping Population. *Plant Physiology*. 2010; 154: 1753-1765.
- 540 14. Lee M, Sharopova N, Beavis WD, Grant D, Katt M, Blair D, et al. Expanding the genetic  
541 map of maize with the intermated B73 x Mo17 (IBM) population. *Plant molecular biology*.



- 542 2002;48: 453-461.
- 543 15. Asaro A, Ziegler G, Ziyomo C, Hoekenga OA, Dilkes BP, Baxter I. The Interaction of  
544 Genotype and Environment Determines Variation in the Maize Kernel Ionome. *G3: Genes*  
545 *Genomes Genetics*. 2016;6: 4175-4183.
- 546 16. Poormohammad Kiani S, Trontin C, Andreatta M, Simon M, Robert T, Salt DE, et al.  
547 Allelic Heterogeneity and Trade-Off Shape Natural Variation for Response to Soil  
548 Micronutrient. *PLOS Genetics*. 2012;8: e1002814.
- 549 17. Barberon M, Vermeer J, De Bellis D, Wang P, Naseer S, Andersen T, et al. Adaptation of  
550 Root Function by Nutrient-Induced Plasticity of Endodermal Differentiation. *Cell*.  
551 2016;164: 447-459.
- 552 18. Chao DY, Gable K, Chen M, Baxter I, Dietrich CR, Cahoon EB, et al. Sphingolipids in the  
553 Root Play an Important Role in Regulating the Leaf Ionome in *Arabidopsis thaliana*. *Plant*  
554 *Cell*. 2011;23: 1061-1081.
- 555 19. Lopez-Arredondo DL, Leyva-Gonzalez MA, Gonzalez-Morales SI, Lopez-Bucio J,  
556 Herrera-Estrella L. Phosphate nutrition: improving low-phosphate tolerance in crops.  
557 *Annual Review of Plant Biology*. 2014;65: 95-123.
- 558 20. Lin Y-F, Liang H-M, Yang S-Y, Boch A, Clemens S, Chen C-C, et al. *Arabidopsis* IRT3 is  
559 a zinc-regulated and plasma membrane localized zinc/iron transporter. *New Phytologist*.  
560 2009;182: 392-404.
- 561 21. Mulder EG. Importance of molybdenum in the nitrogen metabolism of microorganisms and  
562 higher plants. *Plant and Soil*. 1948;1: 94-119.
- 563 22. Mulder EG, Gerretsen FC. Soil manganese in relation to plant growth. *Adv Agron*. 1952;4:  
564 221-277.
- 565 23. Millikan CR. Antagonism between molybdenum and certain heavy metals in plant  
566 nutrition. *Nature*. 1948;161: 528.
- 567 24. Chu Q, Watanabe T, Shinano T, Nakamura T, Oka N, Osaki M, et al. The dynamic state of  
568 the ionome in roots, nodules, and shoots of soybean under different nitrogen status and at  
569 different growth stages. 2016;17: 488-498.
- 570 25. Baxter I, Dilkes BP. Elemental Profiles Reflect Plant Adaptations to the Environment.  
571 *Science*. 2012;336: 1661-1663.
- 572 26. Kamiya T, Borghi M, Wang P, Danku JMC, Kalmbach L, Hosmani PS, et al. The MYB36  
573 transcription factor orchestrates Casparian strip formation. *Proceedings of the National*  
574 *Academy of Sciences*. 2015;112: 10533-10538.
- 575 27. Baxter I, Hosmani PS, Rus A, Lahner B, Borevitz JO, Muthukumar B, et al. Root suberin  
576 forms an extracellular barrier that affects water relations and mineral nutrition in  
577 *Arabidopsis*. *PLoS Genet*. 2009;5: e1000492.
- 578 28. Li B, Kamiya T, Kalmbach L, Yamagami M, Yamaguchi K, Shigenobu S, et al. Role of  
579 LOTR1 in Nutrient Transport through Organization of Spatial Distribution of Root  
580 Endodermal Barriers. *Current Biology*. 2017;27: 758-765.
- 581 29. Broman KW, Speed TP. A model selection approach for the identification of quantitative  
582 trait loci in experimental crosses. *Journal of the Royal Statistical Society: Series B*  
583 *(Statistical Methodology)*. 2002;64: 641-656.
- 584

## 585 **Supporting Information**

586 **S1 Fig. Variances of Principal Components from PCA within 10 Environments.** Eigenvalues  
587 (amount of variation explained) for each PC are shown on the y-axis. Lines are colored by  
588 environment.

589  
590 **S2 Fig. Loadings of Principal Components from Different Environments.** Loadings for each  
591 element are plotted for PCs from different environments. Loadings of PCs plotted on the same  
592 graph are correlated as indicated. PCs shown in (A), (B), and (C) all have a QTL coinciding with  
593 Mo QTL on chromosome 1. PCs shown in (D) have a QTL coinciding with Cd QTL on  
594 chromosome 2. PCs shown in (E) have a QTL coinciding with Ni QTL on chromosome 9.

595  
596 **S3 Fig. Variances of Principal Components from PCA on Lines from all Environments.**  
597 Eigenvalues (amount of variation explained) for each aPC are shown on the y-axis.

598  
599 **S4 Fig. aPC1 and aPC2 Loadings Biplot.** PCA plots showing aPC1 and aPC2 loadings.  
600 Variance explained for each PC is indicated along axes.

601  
602 **S1 Table. PC Variance Proportions and Loadings Across 10 Environments.**

603  
604 **S2 Table. Weather Station Locations.**

## 605 **Figure Legends**

606  
607  
608 **Fig 1. Element Correlations Diagrams for Locations with Repeated Measurements.**

609 Pairwise correlations of 20 kernel elements in varying environments, shown for the experiments  
610 within locations having data from multiple years (FL, IN, and NY). Correlations were calculated  
611 as the Pearson correlation coefficient ( $r_p$ ) between concentration values for each element pair.  
612 Significance was evaluated using a Bonferroni correction for multiple tests within each  
613 environment and set at a corrected p value of 0.05. Lines between elements represent significant  
614 pairwise correlations, weighted by strength of correlation. Positive and negative correlations are  
615 represented as solid and dashed lines, respectively. Red lines indicate correlations present in at  
616 least 5 of the 6 environments shown.

617  
618 **Fig 2. Multiple Element QTL.** Stepwise QTL mapping output from the NY05 population for P,  
619 S, Fe, Mn, Zn, and PC1. Position in cM on chromosome 5 is plotted on the x-axis and LOD score  
620 is shown on the y-axis. 95<sup>th</sup> percentile of highest LOD score from 1000 random permutations is  
621 indicated as horizontal line.

622  
623 **Fig 3. PCA Plots in Multiple Environments.** PCA plots showing PC1 and PC2 loadings in  
624 different years in three locations (FL, IN, and NY). PC1 and PC2 values for each line are plotted  
625 as points and PC1 and PC2 loadings of each element are indicated by blue arrows. The data for  
626 different years for each of three locations, FL, IN, and NY are plotted. The percent of total  
627 variation explained by each PC is labeled on the axes.

628  
629

630 **Fig 4. Principal Component QTL from 10 environments.** PCs were derived from elemental  
631 data separately in each of 10 environments and used as traits for QTL mapping. (A) 172 total  
632 element and PC QTL were mapped. The two boxes represent the 79 and 93 elemental and PC  
633 QTL, respectively. 18 element QTL overlap with PC QTL from the same environment. 56 PC  
634 QTL overlap with element QTL from the same environment. Sets of non-unique QTL are shown  
635 in the center box. QTL unique to elements, 61, and to PCs, 37, are shown outside of the shared  
636 box. (B) QTL mapping output for PC5 from the NY06 population. Position on chromosome 1 is  
637 shown on the x-axis, LOD score is on the y-axis. All significant NY06 element QTL on  
638 chromosome 1 are shown in grey ( $\alpha = 0.05$ ). Two PC5 QTL, at 169.7 and 271.2 cM, are unique  
639 to PC5 and do not overlap with any elemental QTL. A PC5 QTL at 379.7 cM is shared with a  
640 molybdenum QTL. (C) Significant PC QTL ( $\alpha = 0.05$ ) for PCs in 10 environments. QTL  
641 location is shown across the 10 chromosomes on the x-axis. Environment in which QTL was  
642 found is designated by color. QTL are represented as dashes of uniform size for visibility. Four  
643 regions highlighted in grey represent the four loci found for multiple PC traits in multiple  
644 environments ( $> 2$ ).

645  
646 **Fig 5. PCA Separates Lines by Environment.** PC1 and PC2 separate lines by environment.  
647 Points correspond to lines, colored by their environment. (A) Across-environment PC1 vs PC2  
648 values for each line, colored by environment. Percentage of total variance accounted for by each  
649 PC indicated on the axes. (B) Average across-environment PC1 vs PC2 values for all lines in  
650 each environment.

651  
652 **Fig 6. aPC and Weather Variable Correlations.** (A) Heatmap showing Pearson correlation  
653 coefficients ( $r_p$ ) between averaged aPC 1–7 values across environments and averages for  
654 maximum temperature, minimum temperature, and GDD across the growth season and for each  
655 quarter of the season. Red and blue intensities indicate strength of positive and negative  
656 correlations, respectively. (B) Average aPC1 values for 9 environments vs. average maximum  
657 temperature for each environment over the fourth quarter of the growing season. Points colored  
658 by environment. Pearson correlation coefficient is shown within the graph. (C) Average aPC2  
659 values for nine environments vs. average maximum temperature for each environment over the  
660 3rd quarter of the growing season. (D) Heatmap showing correlations between aPCs 1–7 and soil  
661 attributes: pH, electrical conductivity (EC), available water capacity (AWC), available water  
662 storage (AWS), and calcium carbonate ( $\text{CaCO}_3$ ). (E) Average aPC2 values vs. pH.

663  
664 **Fig 7. Across-Environment PCA QTL in 10 Environments.** QTL identified for across  
665 environment PCA traits (aPCs 1–7). (A) Total number of QTL detected for each aPC, colored  
666 by environment. (B) Significant QTL ( $\alpha = 0.05$ ) for aPCs 1–7. QTL location is shown across 10  
667 chromosomes (in cM) on the x-axis. Dashes indicate QTL, with environment in which QTL was  
668 found designated by color. All dashes are the same length for visibility.

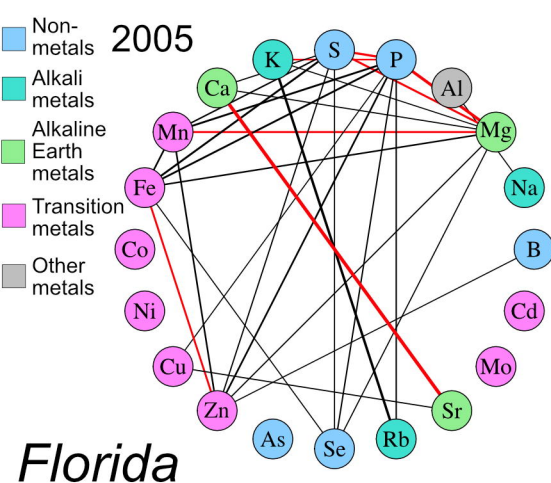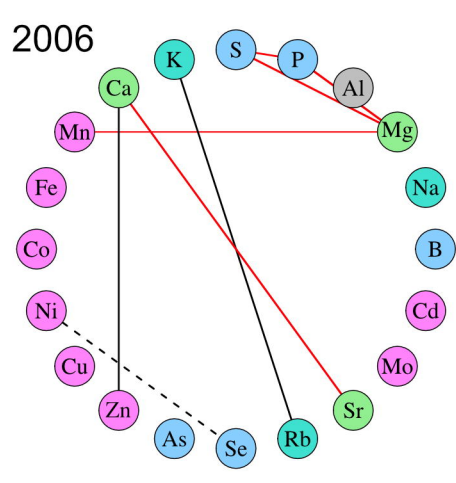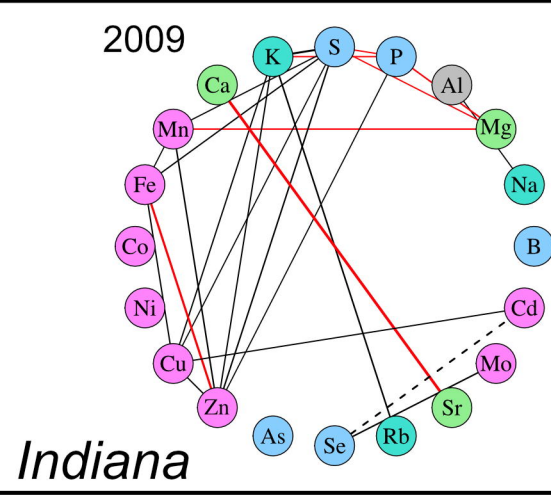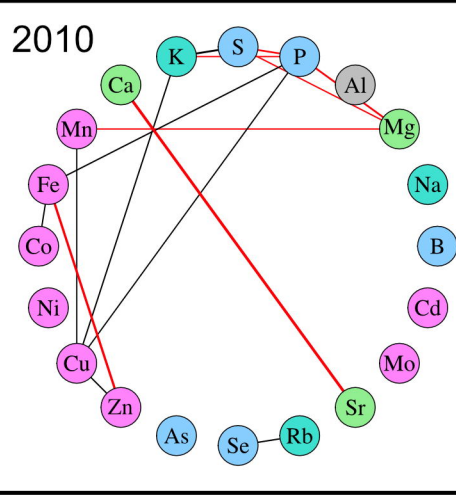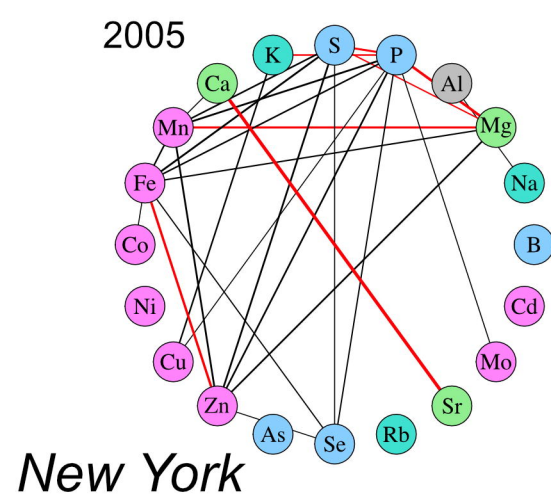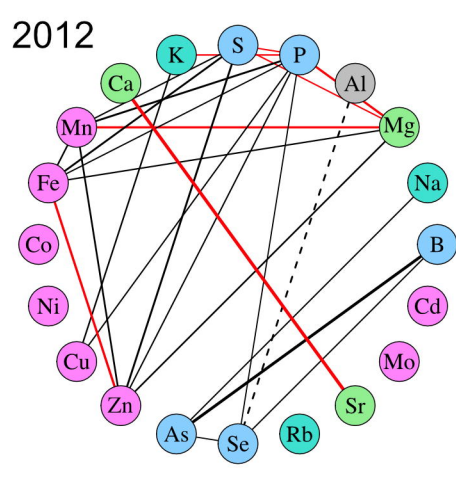

# Elements and PC1 Share QTL from NY05

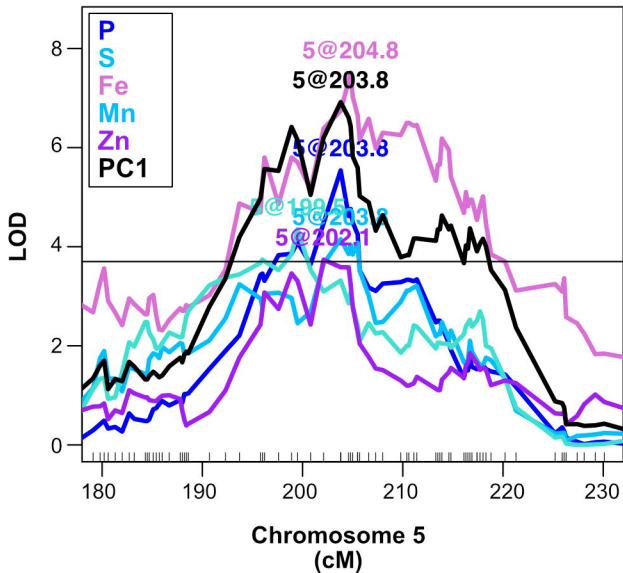

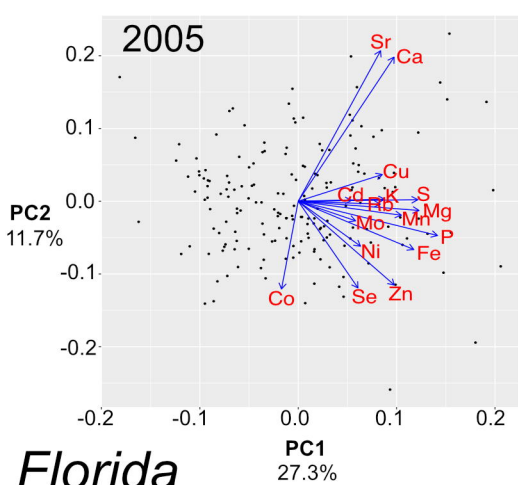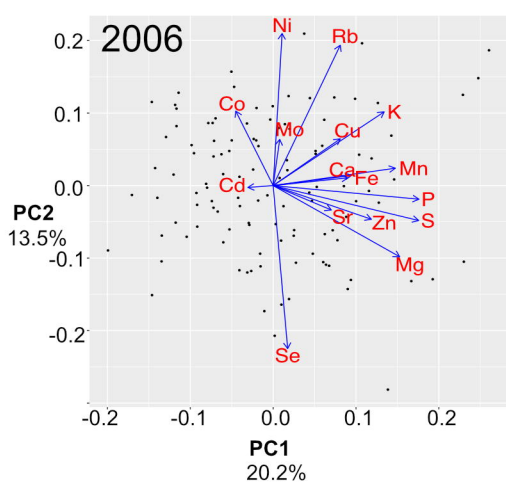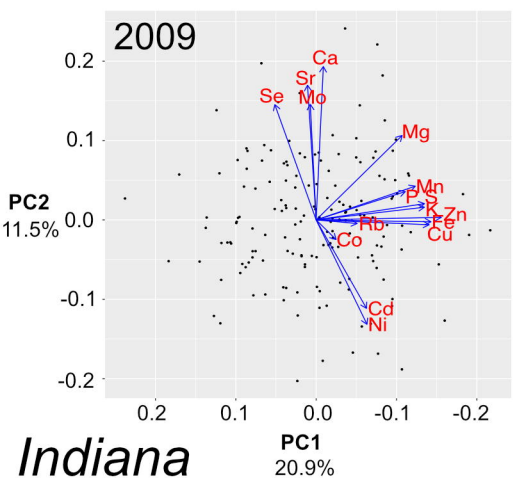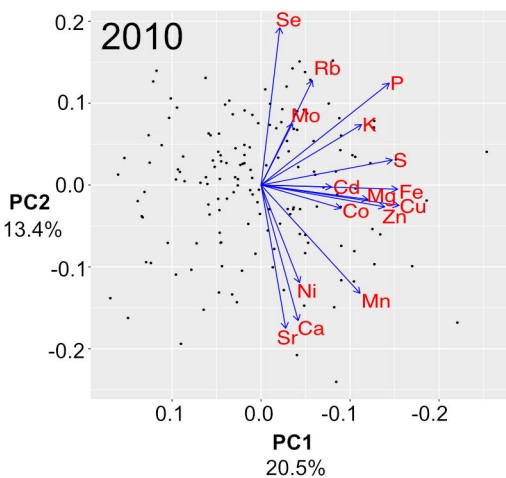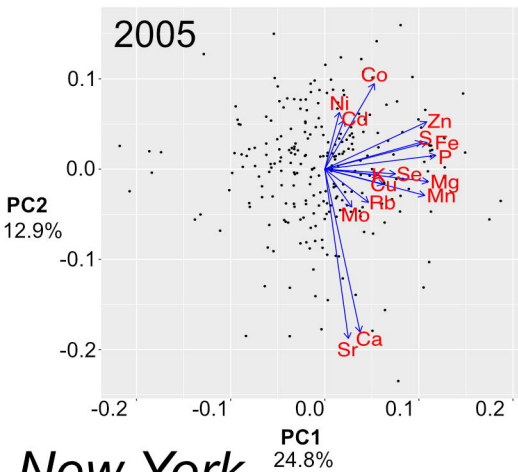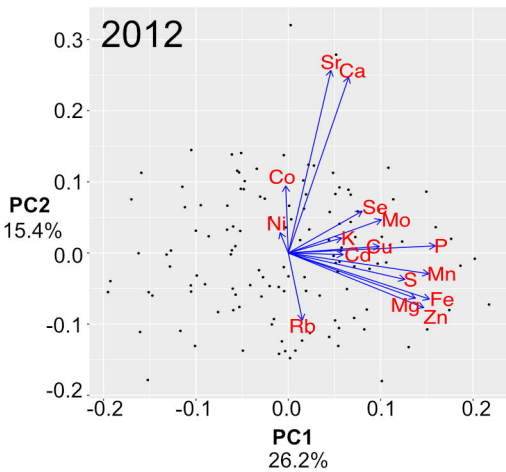

**A**

180 total QTL detected using complementary methods

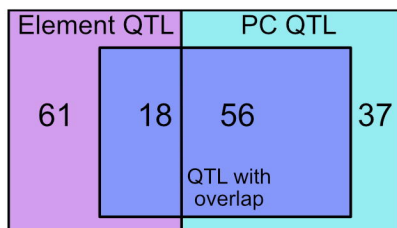**B**

Unique and Overlapping PC5 QTL in NY06

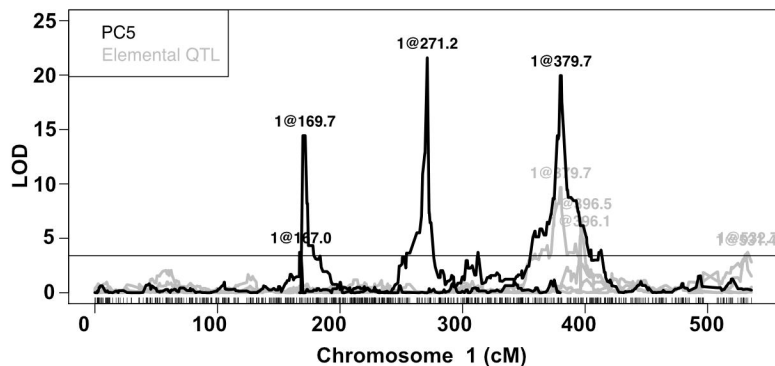**C**

Full Genome View: PC QTL

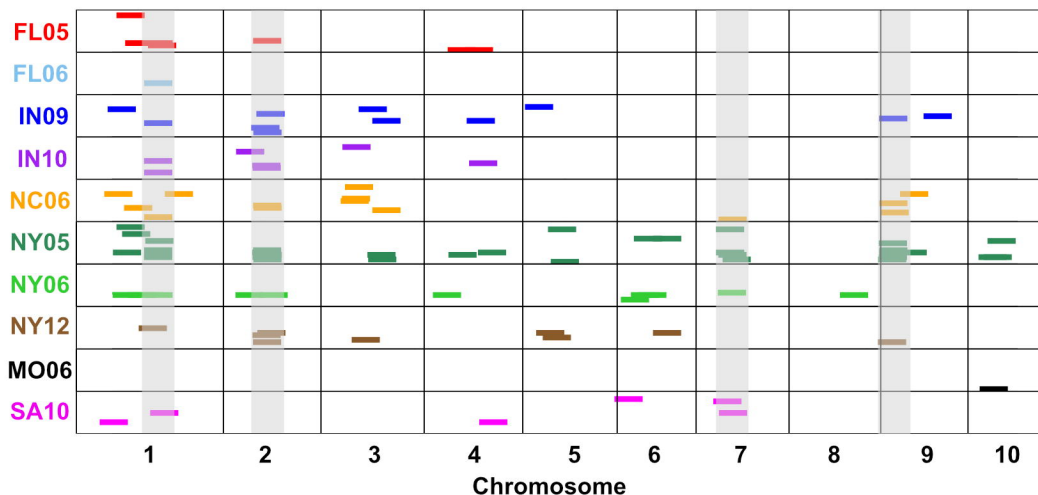

**A** PCA of Ionome Elements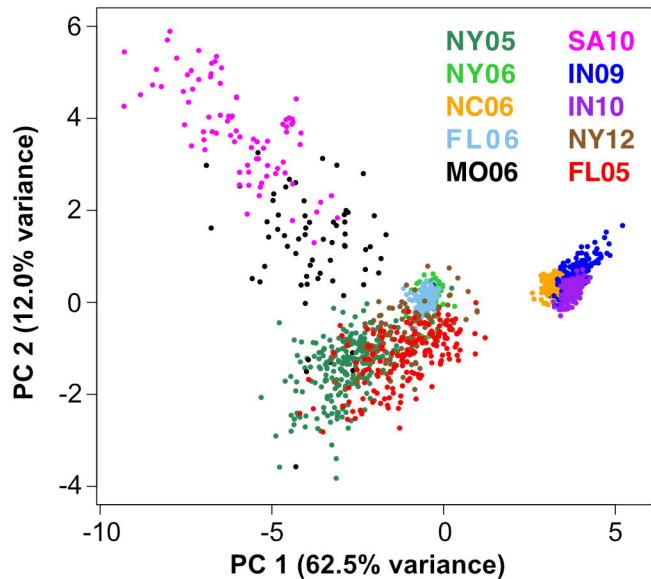**B** PCA of Ionome Elements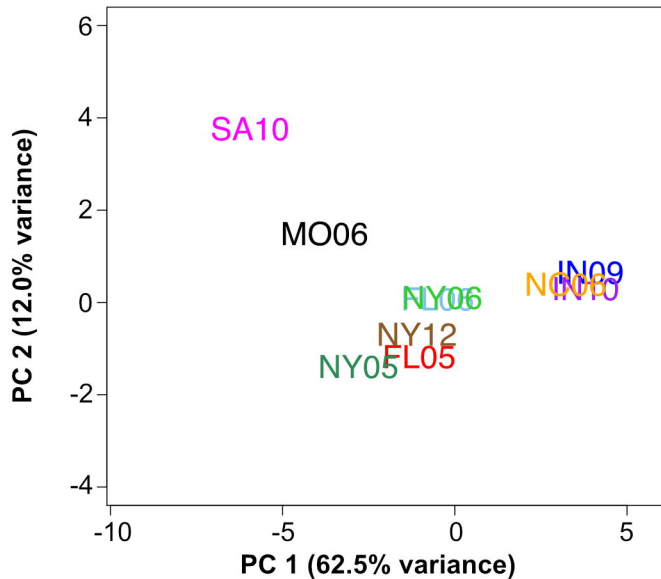



### A Weather Data and aPC 1-7 Correlations

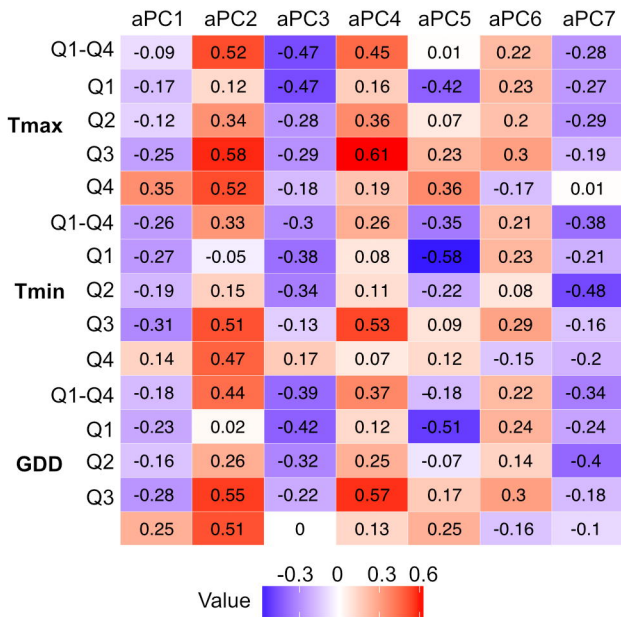

### B aPC1 vs 4th Quarter Tmax

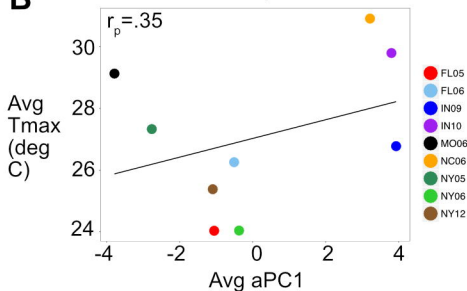

### C aPC2 vs 3rd Quarter Tmax

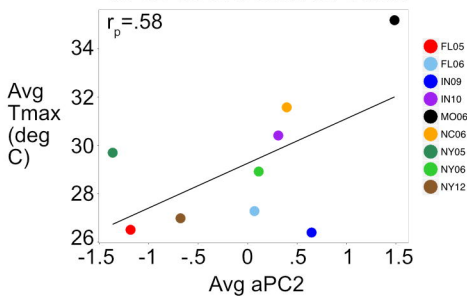

### D Soil Data and aPC 1-7 Correlations

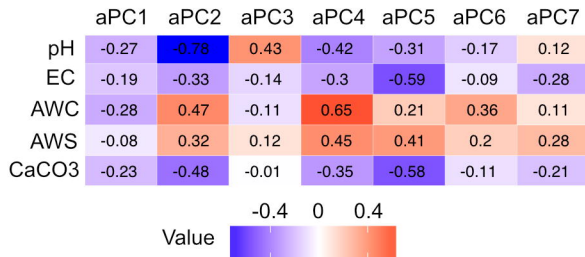

### E aPC2 vs pH

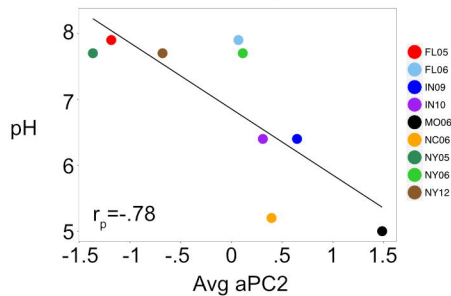

# A PCA Across Environments QTL

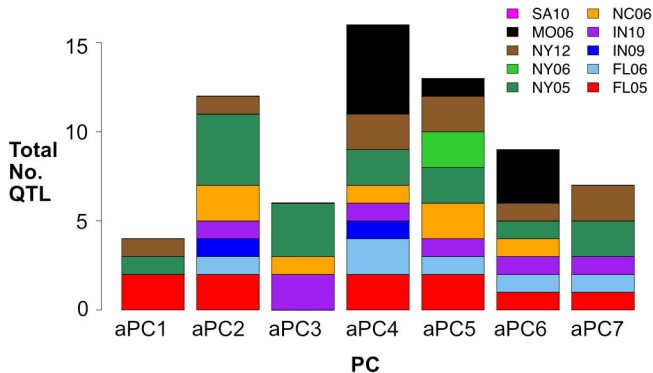

# B Full Genome Plot: PCA Across Environments QTL

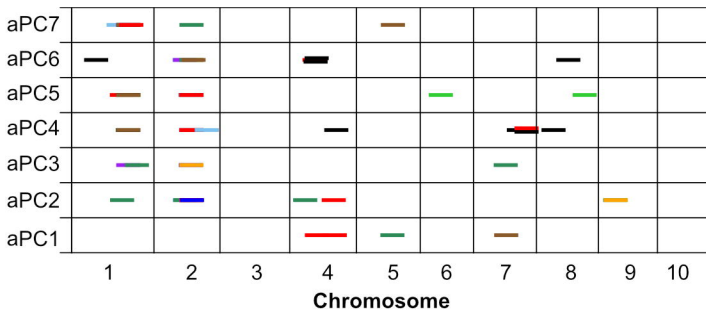

Source: https://www.biorxiv.org/content/10.1101/241380v1.full.pdf
